# Supplementary material
Source: publisher site journal article supplement (https://www.spandidos-publications.com/2952/downloadSupplementary)
Supplement: Supplementary file 1 [file downloadSupplementary]

Figure S1. SEPT6 protein expression levels in another 16 paired HCC and corresponding adjacent non-tumor tissue samples were assessed via western blotting. (A, C and D) SEPT6 protein expression levels were increased in 12 HCC tissues compared with the adjacent non-tumor tissues. (B) SEPT6 protein expression levels were decreased in 4 HCC tissues compared with the adjacent non-tumor tissues. \* $P < 0.01$  and \*\*\* $P < 0.001$  vs. corresponding adjacent non-tumor tissue samples. SEPT6, septin 6; HCC, hepatocellular carcinoma; N, adjacent non-tumor tissues; C, HCC tissues.

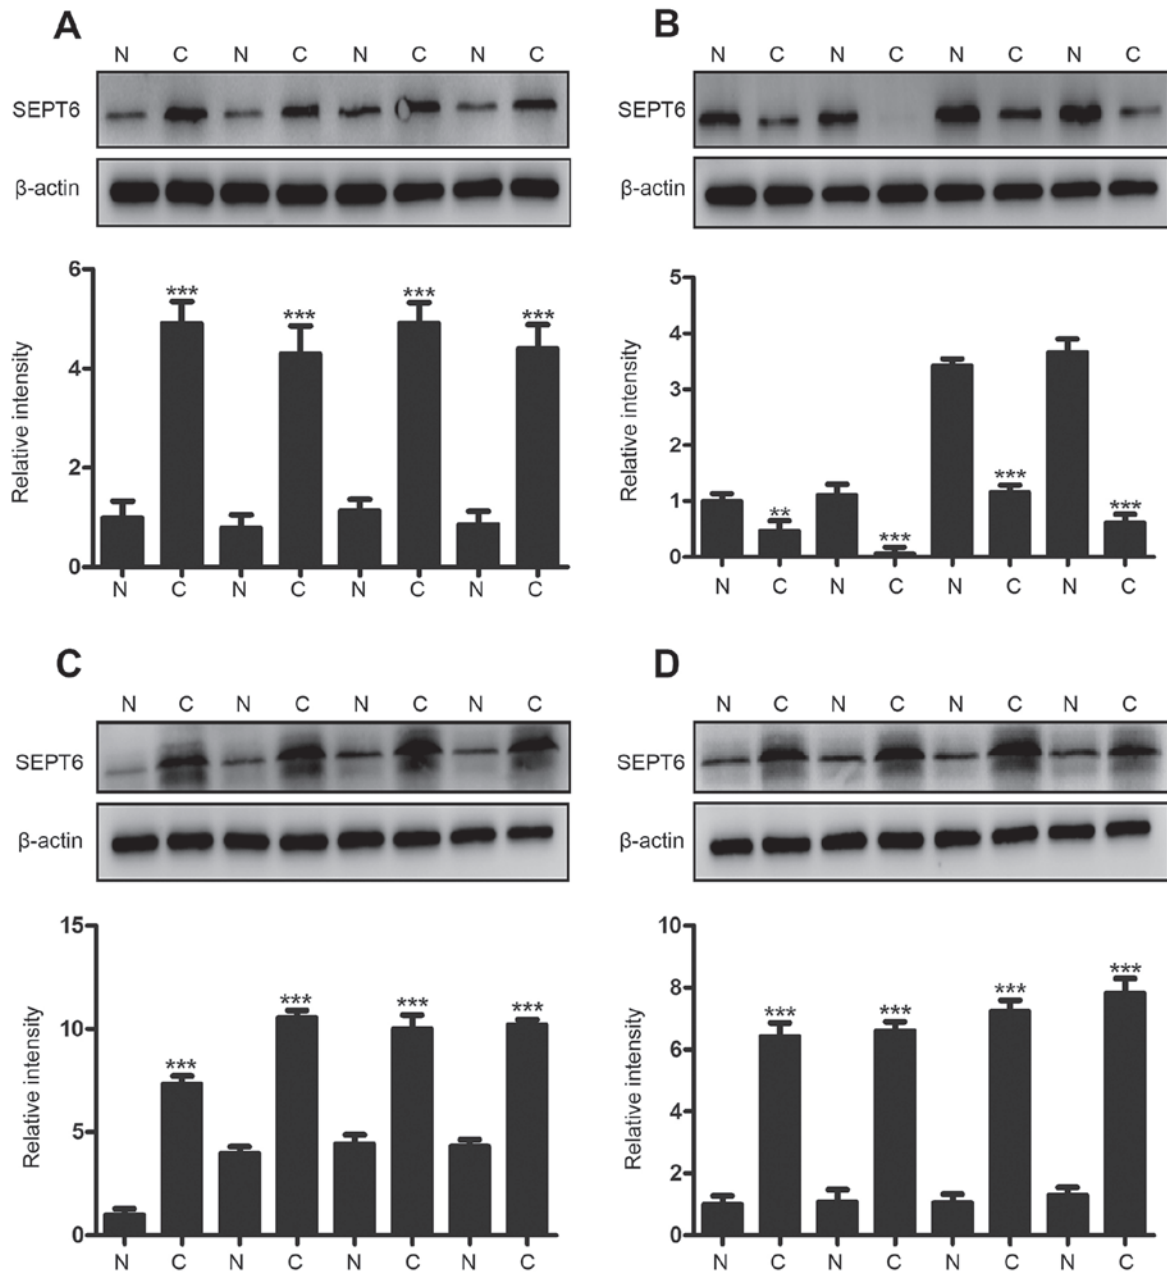

Figure S2. Transfection efficiencies of SEPT6 knockdown and overexpression. Transfection efficiencies of sh-SEPT61/2 in HCC-LM3 cells and SEPT6 in Hep3B cells were determined via (A) reverse transcription-quantitative PCR and (B) western blotting. At 48 h post-transfection, cells were treated with G418 (400  $\mu$ g/ml) for 2 weeks for stable cell selection. \*\* $P < 0.01$  and \*\*\* $P < 0.001$  vs. shcontrol or Vector. SEPT6, septin 6; sh, short hairpin RNA.

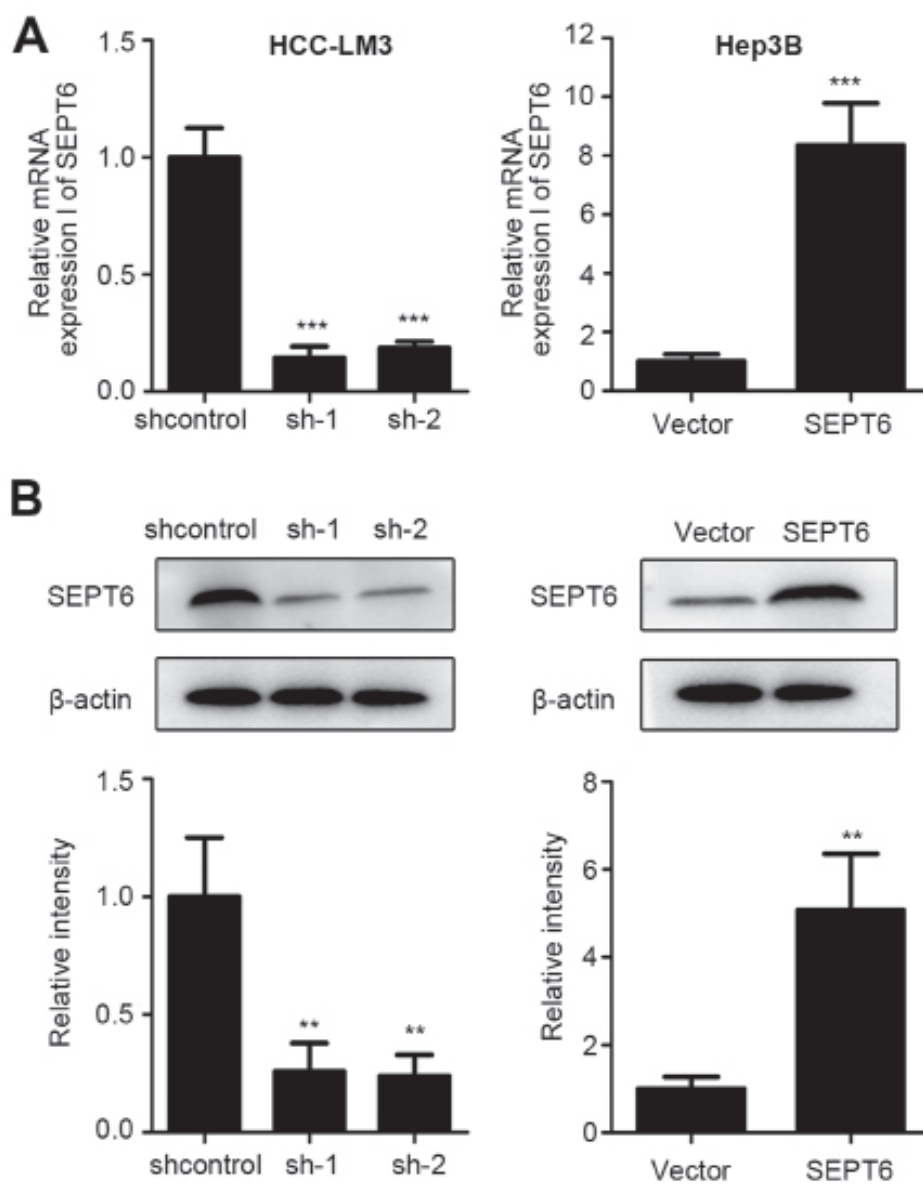

Figure S3. Transfection efficiency of YAP knockdown and overexpression. MHCC-97H cells were transfected with YAP or vector. Huh7 cells were transfected with sh-YAP or sh-control. At 48 h post-transfection, cells were treated with G418 (400  $\mu$ g/ml) for 2 weeks for stable cell selection. Transfection efficiencies were determined via (A) reverse transcription-quantitative PCR and (B) western blotting. \*\* $P < 0.01$  and \*\*\* $P < 0.001$  vs. Vector or shcontrol. YAP, yes-associated protein; sh, short hairpin RNA.

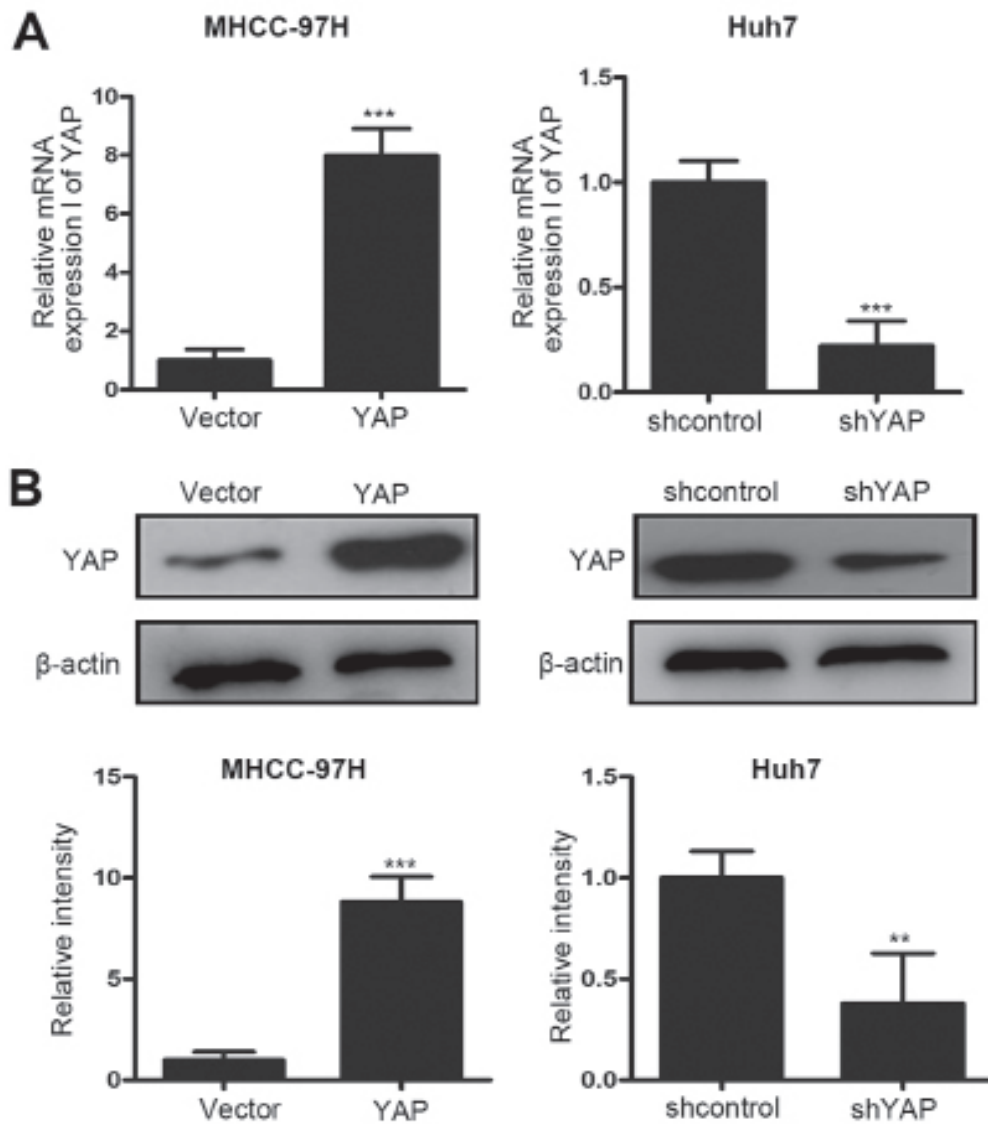

Figure S4. SEPT6 regulates cyclin D1 and MMP2 expression via YAP, and YAP also independently regulates cyclin D1 and MMP2 expression. Cyclin D1 and MMP2 (A) mRNA and (B) protein expression levels were determined via reverse transcription-quantitative PCR and western blotting. \*\*\*P<0.001 vs. Vector; ###P<0.001 vs. SEPT6. SEPT6, septin 6; MMP, matrix metalloproteinase; YAP, yes-associated protein; sh, short hairpin RNA

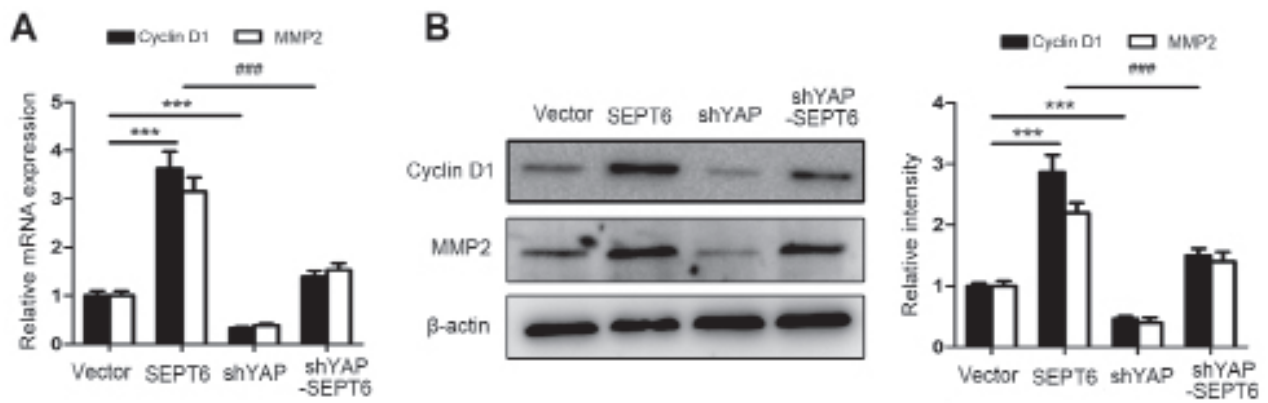

Table SI. Sequences of primers used for quantitative PCR and shRNAs.

| Primer/vector  | Sequence (5'→3')                                     |
|----------------|------------------------------------------------------|
| $\beta$ -actin | F: CATGTACGTTGCTATCCAGGC<br>R: CTCCTTAATGTCACGCACGAT |
| SEPT6          | F: TCCAAGAGAGCAACGTGAGG<br>R: AATCCACGATAGGCTTGTAGC  |
| Cyclin D1      | F: GCTGCGAAGTGGAAACCATC<br>R: CCTCCTTCTGCACACATTTGAA |
| Cyclin E1      | F: ACTCAACGTGCAAGCCTCG<br>R: GCTCAAGAAAGTGCTGATCCC   |
| MMP2           | F: TACAGGATCATTGGCTACACACC<br>R: GGTCACATCGCTCCAGACT |
| MMP9           | F: TGTACCGCTATGGTTACACTCG<br>R: GGCAGGGACAGTTGCTTCT  |
| YAP            | F: TAGCCCTGCGTAGCCAGTTA<br>R: TCATGCTTAGTCCACTGTCTGT |
| shSEPT6-1      | GCAGCACAGAAGAACUGAA                                  |
| shSEPT6-2      | GACCUAGUGACUAUGAAGA                                  |
| shYAP          | GGAATTGAGAACAATGACGAC                                |
| Control        | UUCUCCGAACGUGUCACG                                   |

SEPT6, septin 6; MMP, matrix metalloproteinase; sh, short hairpin RNA; YAP, yes-associated protein; F, forward; R, reverse.

Table SII. Antibodies used for western blotting.

| Antibody        | Dilution | Cat. no.   | Supplier details                       |
|-----------------|----------|------------|----------------------------------------|
| SEPT6           | 1:400    | 12805-1-AP | ProteinTech Group, Inc.                |
| Cyclin D1       | 1:2,000  | 60186-1-Ig | ProteinTech Group, Inc.                |
| Cyclin E1       | 1:1,000  | 11554-1-AP | ProteinTech Group, Inc.                |
| MMP2            | 1:1,000  | 4022       | Cell Signaling Technology, Inc.        |
| MMP9            | 1:300    | BA0573     | Boster Biological Technology Co., Ltd. |
| LATS1           | 1:1,000  | 9153       | Cell Signaling Technology, Inc.        |
| YAP             | 1:1,000  | 14074      | Cell Signaling Technology, Inc.        |
| p-LATS1         | 1:1,000  | 9157       | Cell Signaling Technology, Inc.        |
| p-YAP           | 1:1,000  | 13008      | Cell Signaling Technology, Inc.        |
| LATS2           | 1:1,000  | 5888       | Cell Signaling Technology, Inc.        |
| Lamin B1        | 1:5,000  | 66095-1-Ig | ProteinTech Group, Inc.                |
| $\beta$ -actin  | 1:2,000  | BM0627     | Boster Biological Technology Co., Ltd. |
| Anti-Rabbit IgG | 1:1,000  | A0208      | Beyotime Institute of Biotechnology    |
| Anti-mouse IgG  | 1:1,000  | A0216      | Beyotime Institute of Biotechnology    |

SEPT6, septin 6; MMP, matrix metalloproteinase; LATS, large tumor suppressor kinase; YAP, yes-associated protein; p, phosphorylated.
